# Supplementary material for: Cell-autonomous retinoic acid receptor signaling has stage-specific effects on mouse enteric nervous system
Source: PubMed Central journal article supplement (PMC8262371; doi:10.1172/jci.insight.145854), 2021-05-24
Supplement: jciinsight-6-145854-s157.pdf [file jciinsight-6-145854-s157.pdf]

# Supplemental Figure 1

TdTomato TuJ1 DAPI

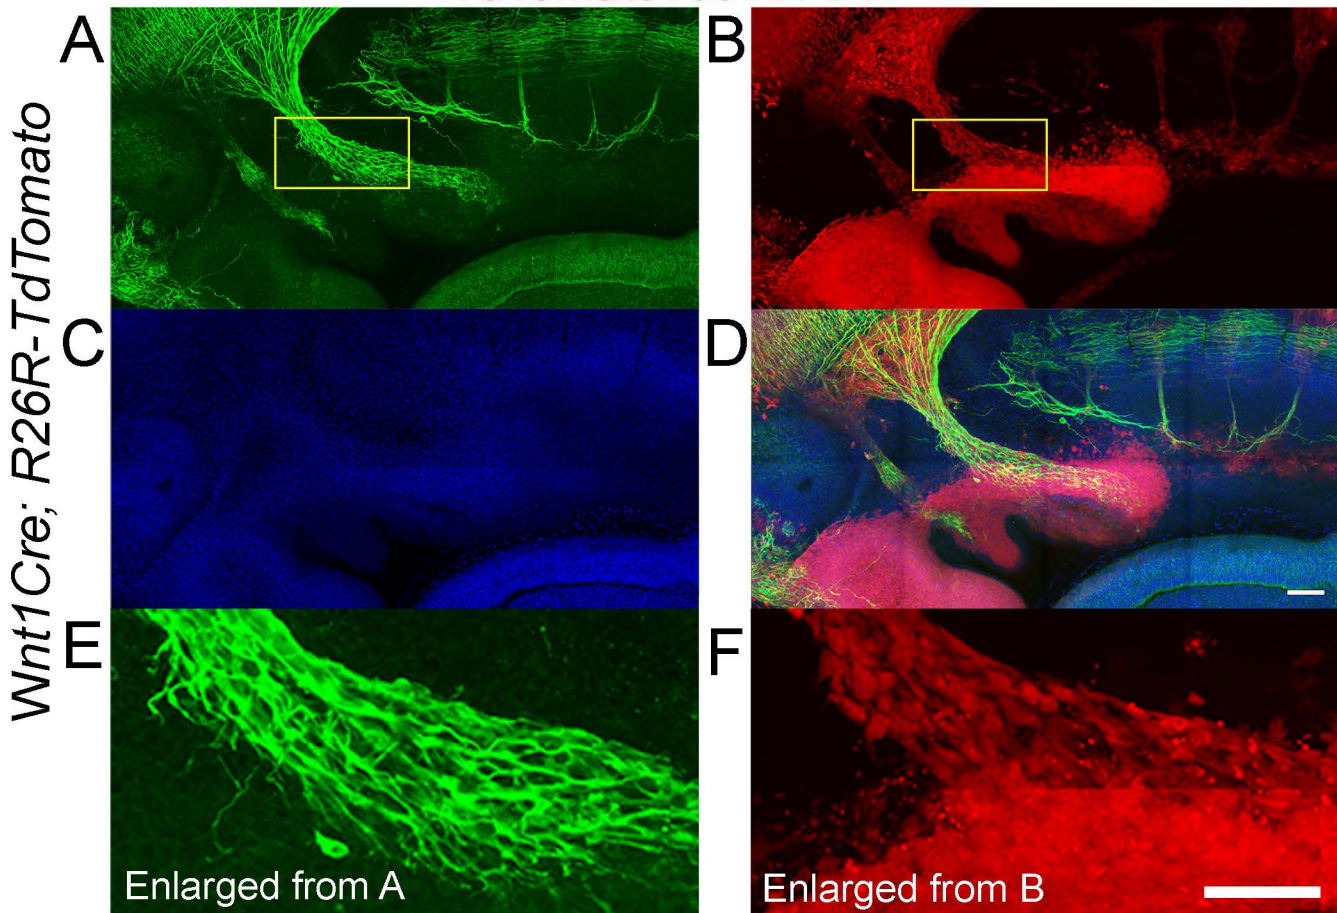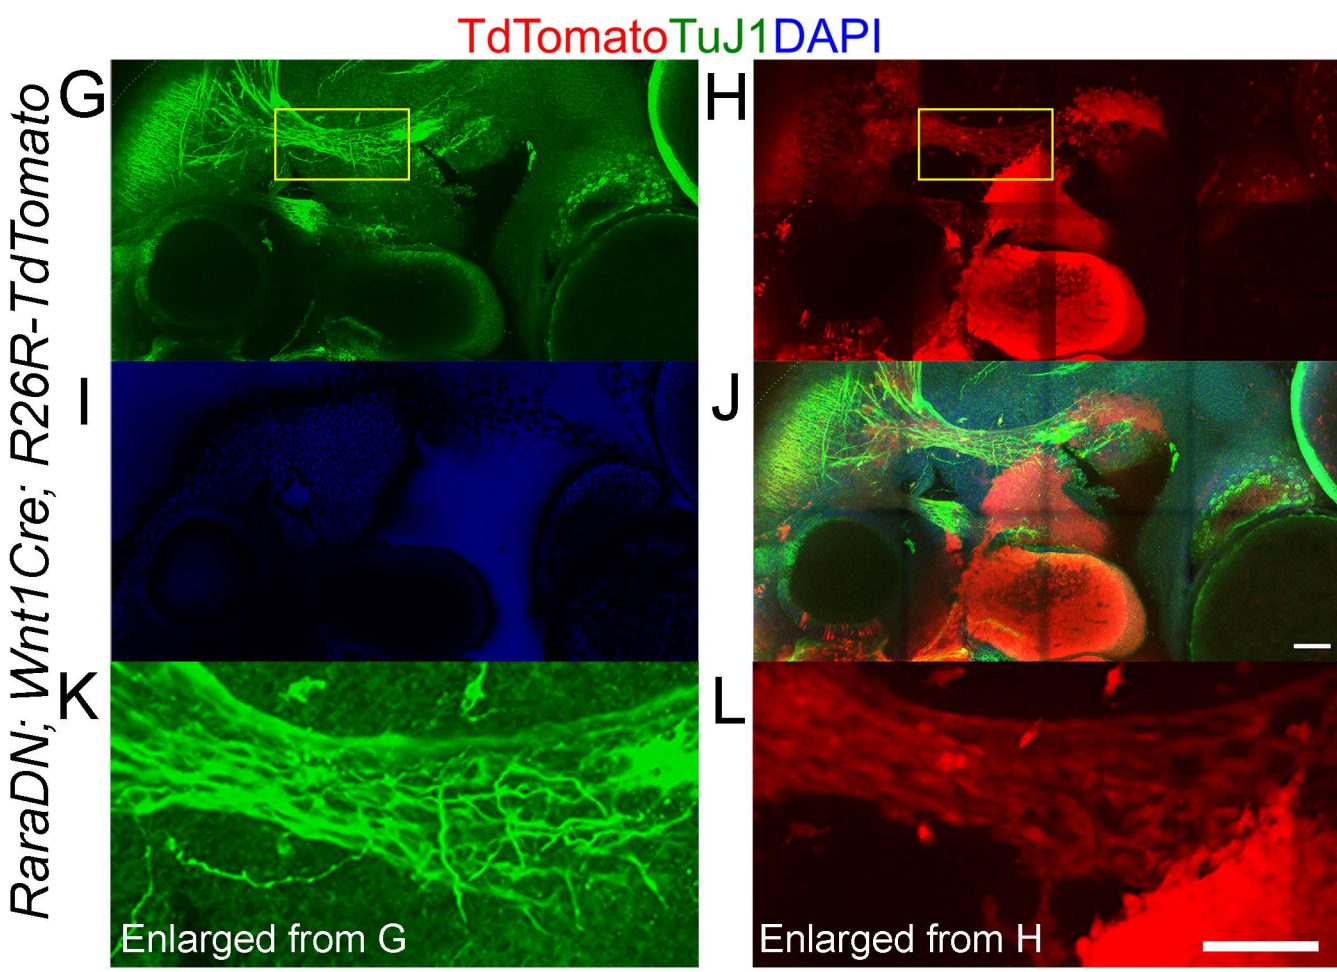

# Supplemental Figure 2

E12.5 *SOX10Cre; R26R-TdTomato*

Stomach

Mid gut

Colon

Merge

TdTomato

RET

HuC/D

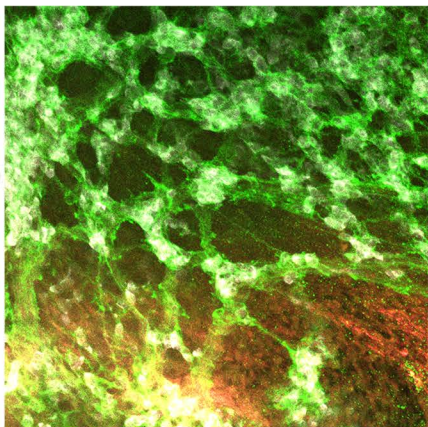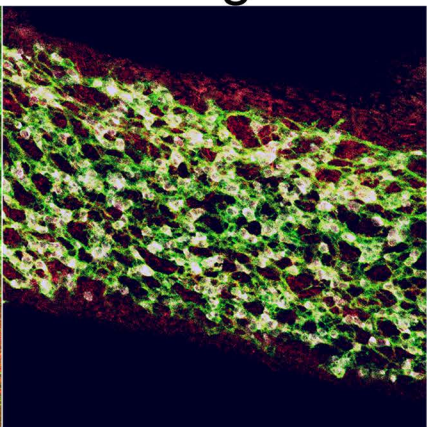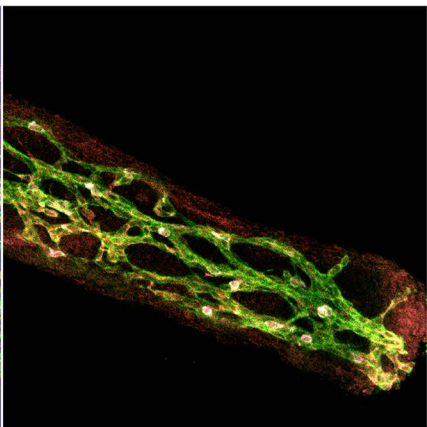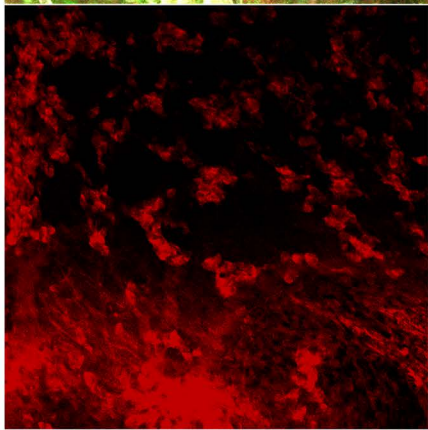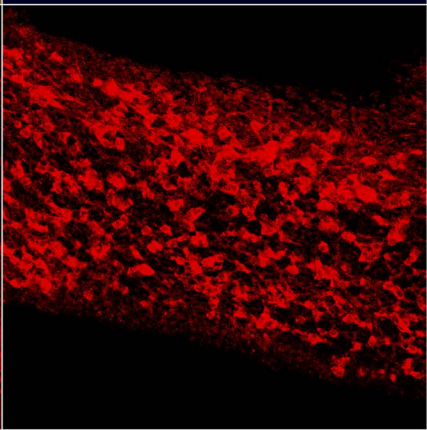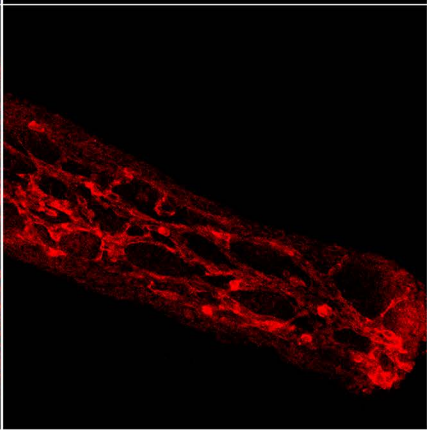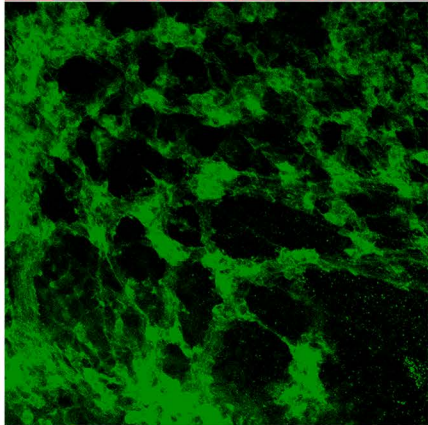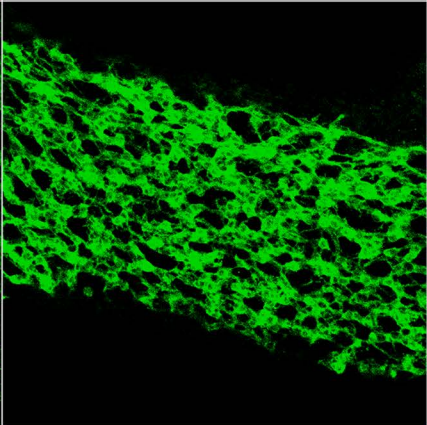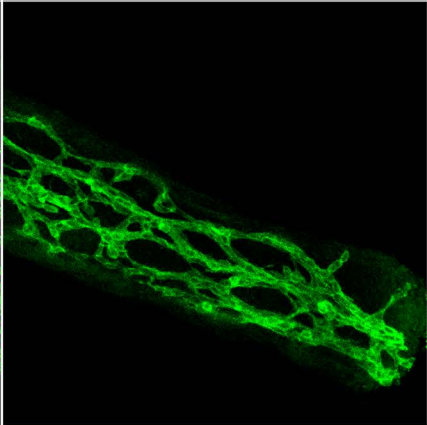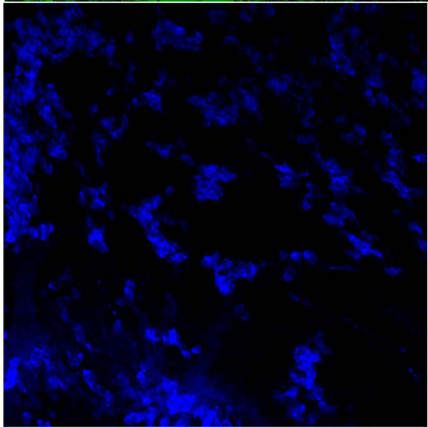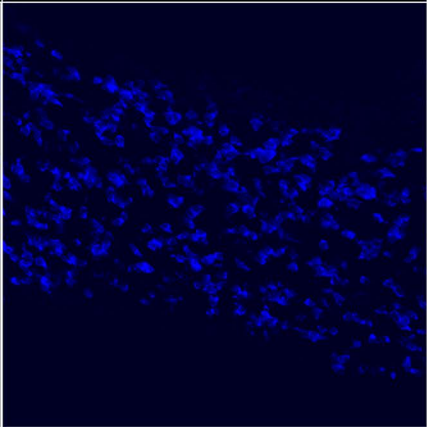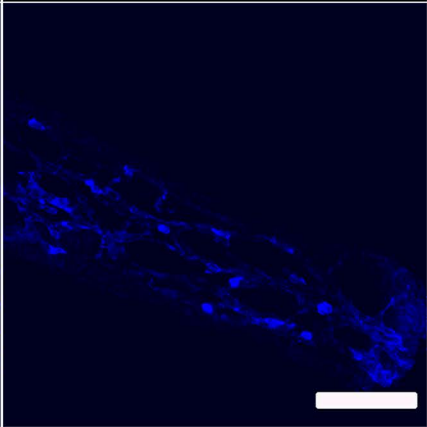

Supplemental Figure 3

*RET*CreERT2-EYFP<sup>Tandem</sup>

Tamoxifen treatment at E10.5

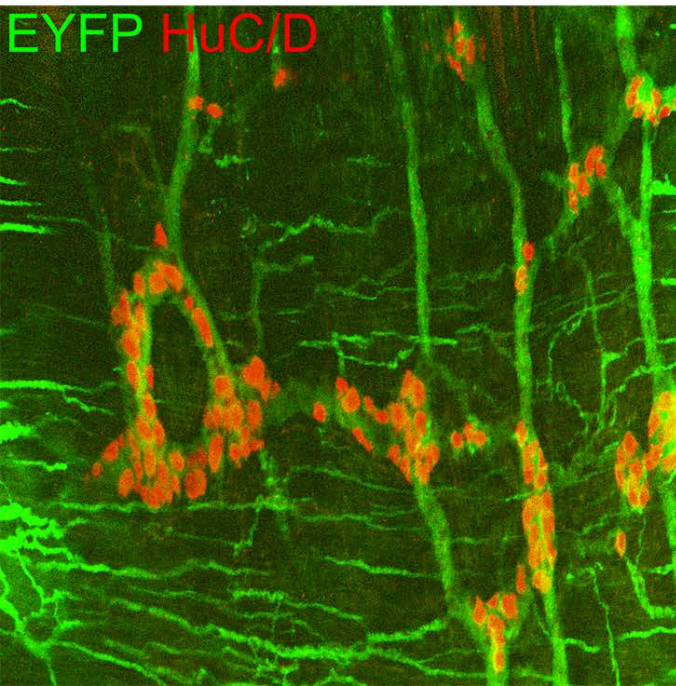

No tamoxifen treatment

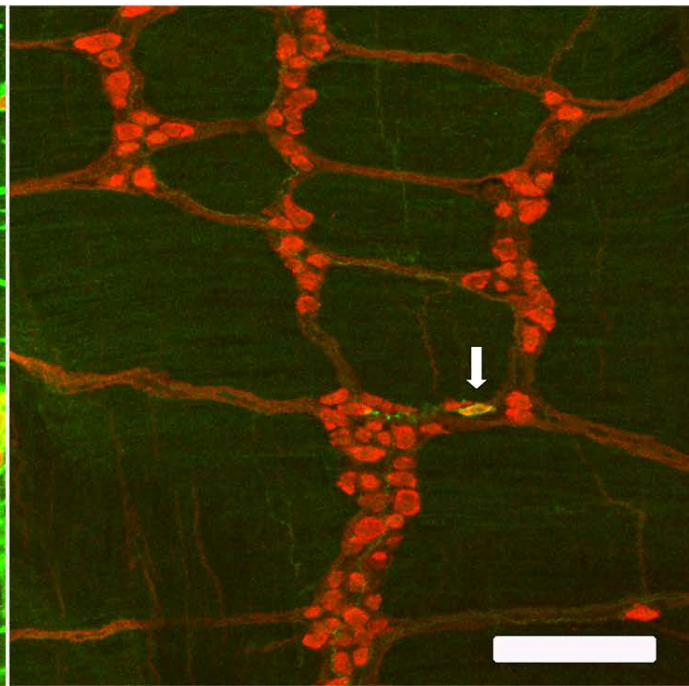

# Supplemental Figure 4

## A

Submucosal plexus

*Rar $\alpha$* :DN;  
*RET*-  
*CreERT2-EYFP*<sup>Tandem</sup>

*Rar $\alpha$* :DN

Myenteric Plexus

*Rar $\alpha$* :DN;  
*RET*-  
*CreERT2-EYFP*<sup>Tandem</sup>

*Rar $\alpha$* :DN

Hu

SOX10

EYFP

Hu SOX10 EYFP

## B

Submucosal Plexus

*Rar $\alpha$* :DN;  
*RET*-  
*CreERT2-EYFP*<sup>Tandem</sup>

*Rar $\alpha$* :DN

Myenteric Plexus

*Rar $\alpha$* :DN;  
*RET*-  
*CreERT2-EYFP*<sup>Tandem</sup>

*Rar $\alpha$* :DN

Hu

NOS1

Hu NOS1

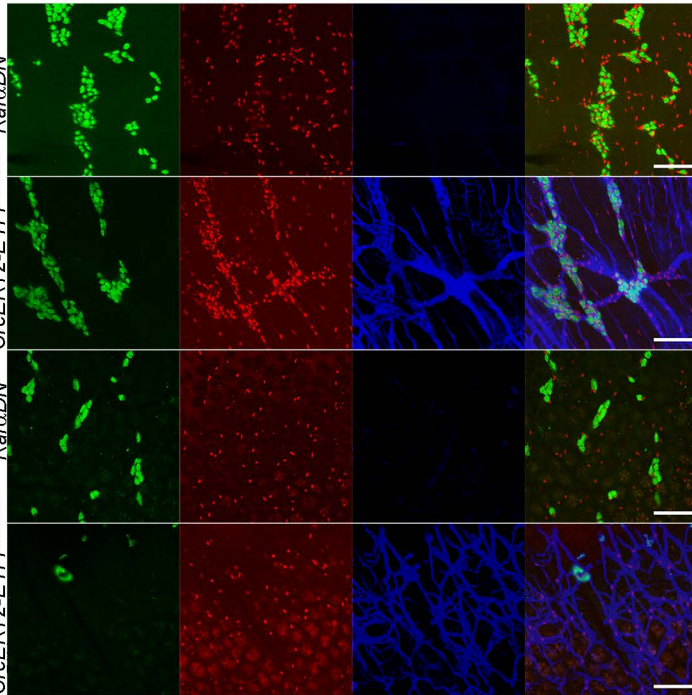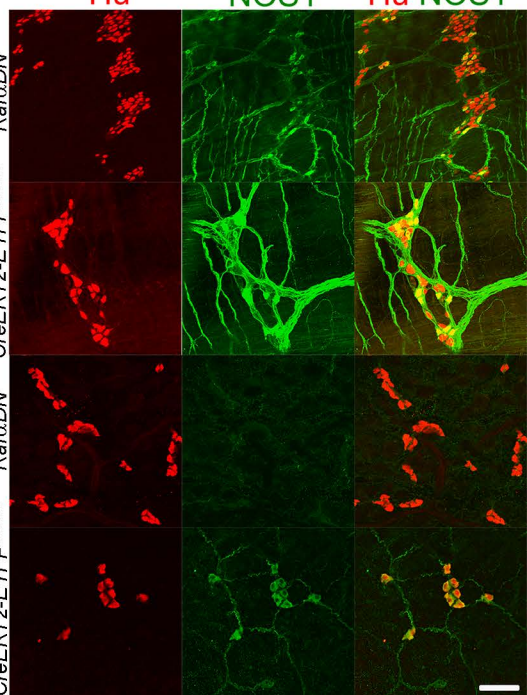

# Supplemental Figure 5

## A E11.5 Stomach ENCDC

Top 20 genes less abundant in mutant

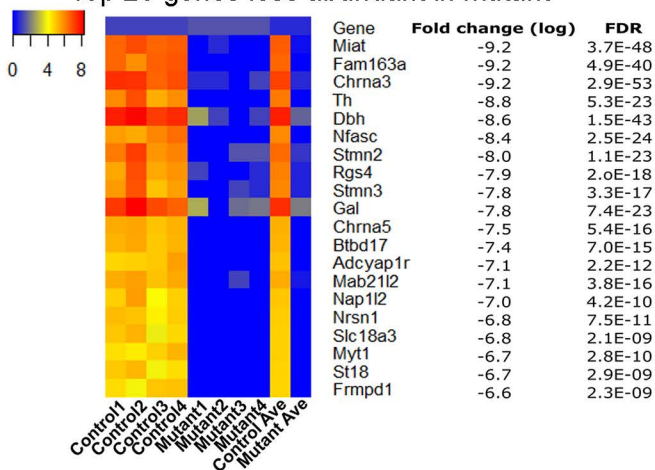

## B E13.5 Colon ENCDC

Top 20 genes less abundant in mutant

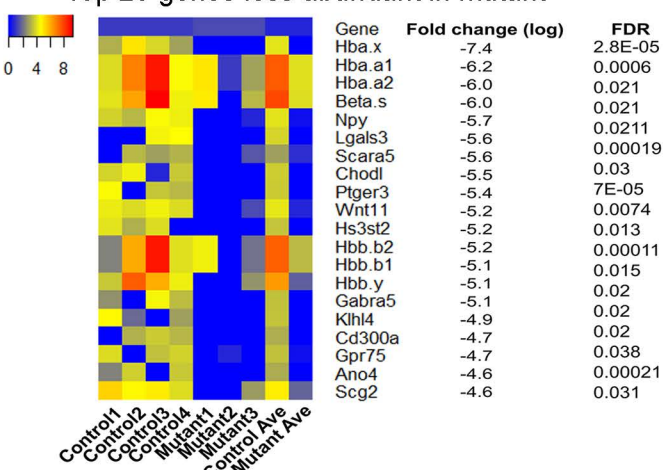

## Top 20 genes more abundant in mutant

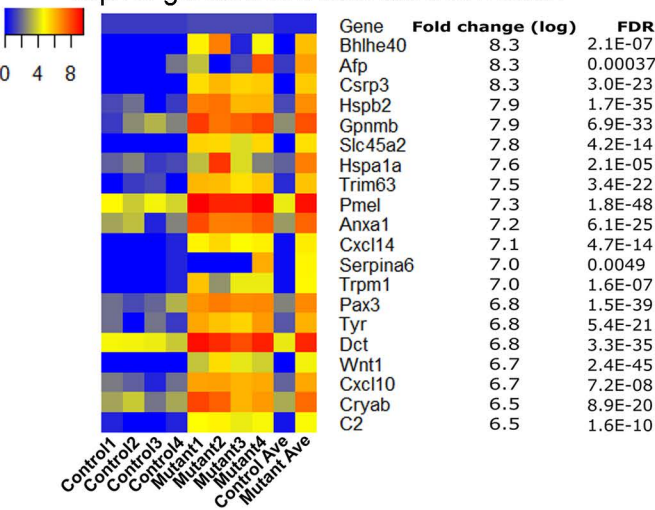

## Top 20 genes more abundant in mutant

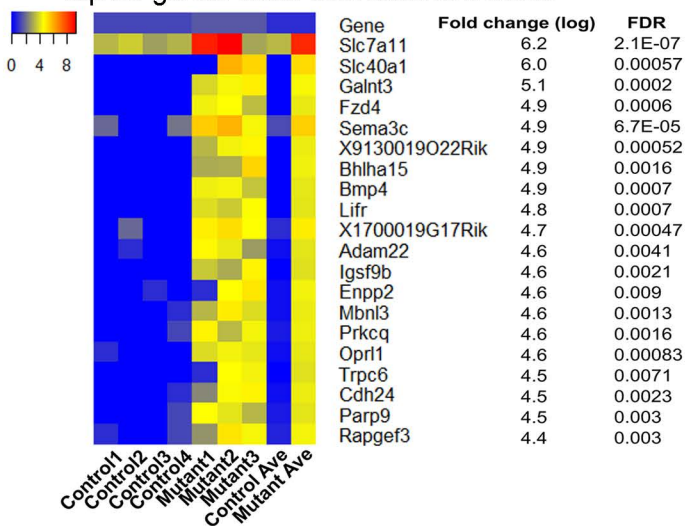

# Supplemental Figure 6

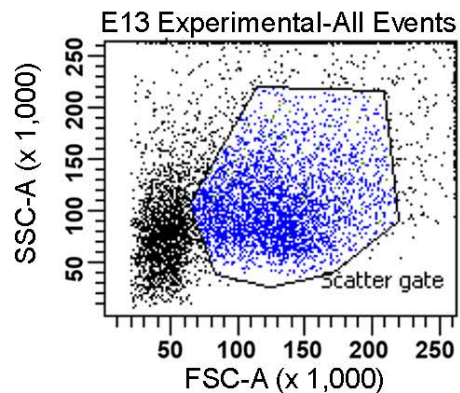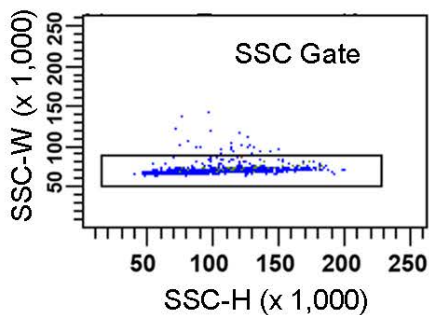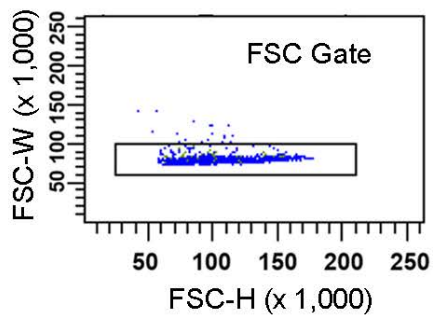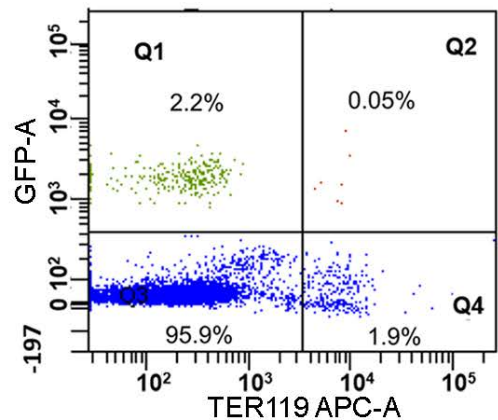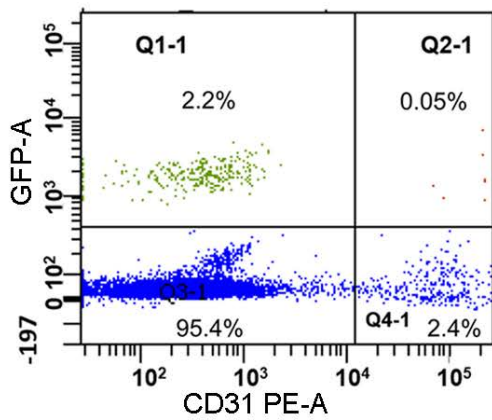

# Supplemental Figure 7

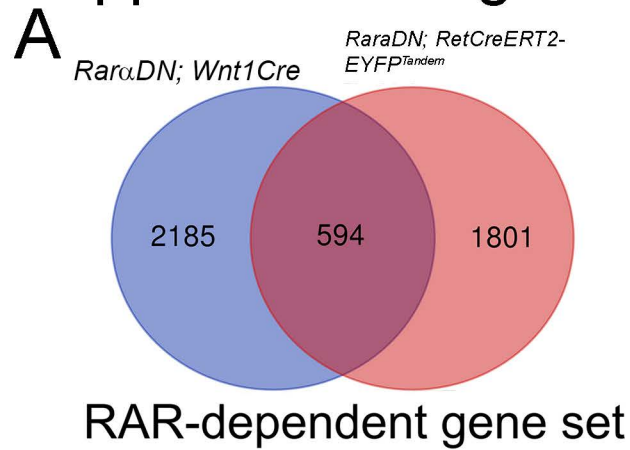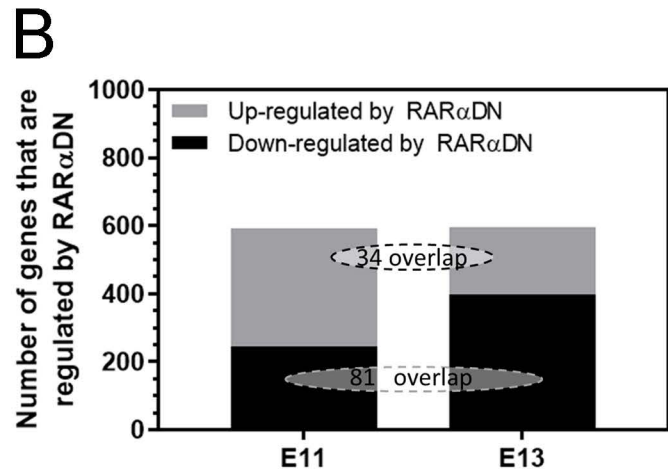

**C**

## Gene enrichment pathway analysis

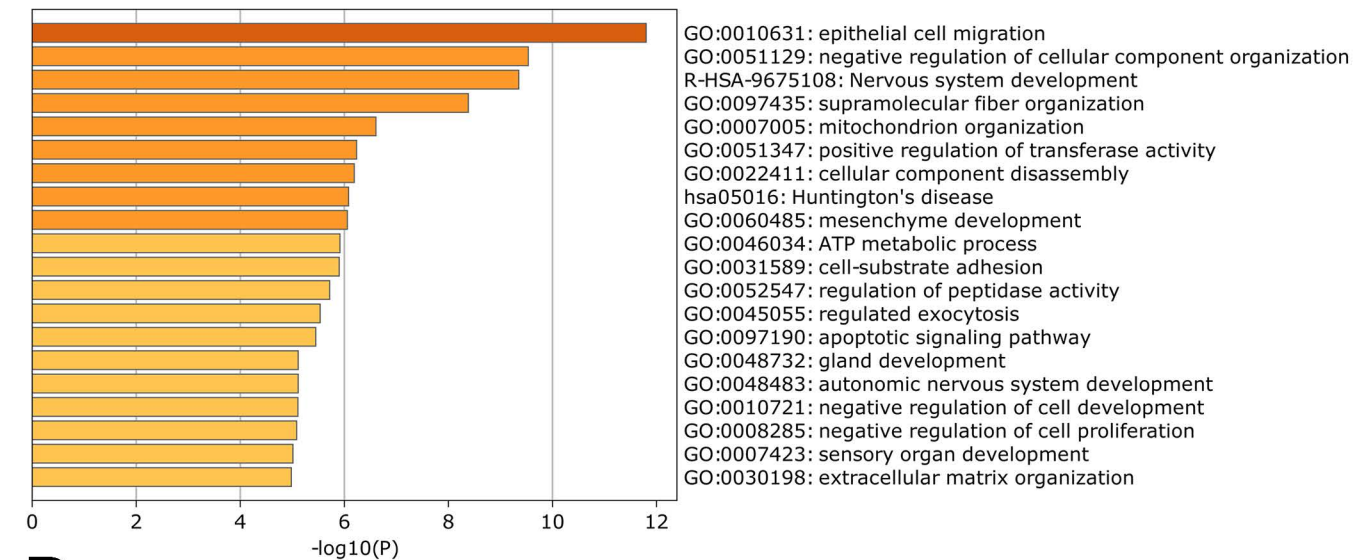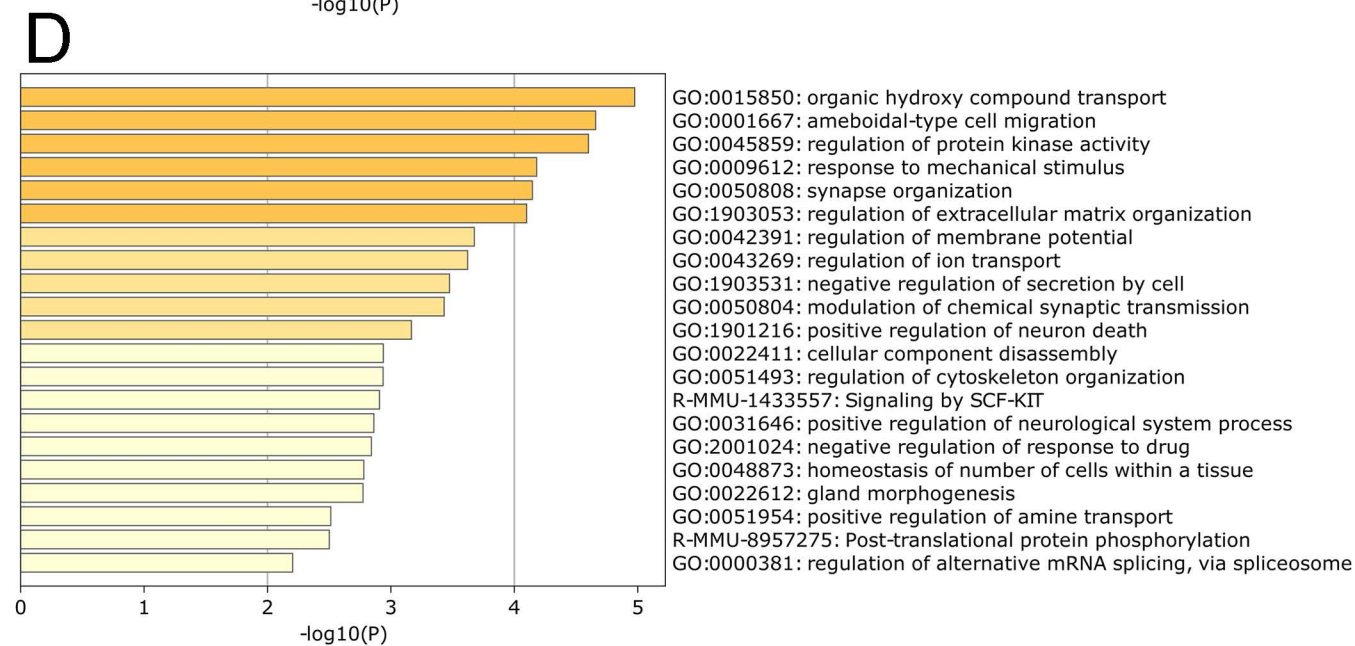

# Supplemental Figure 8

## A

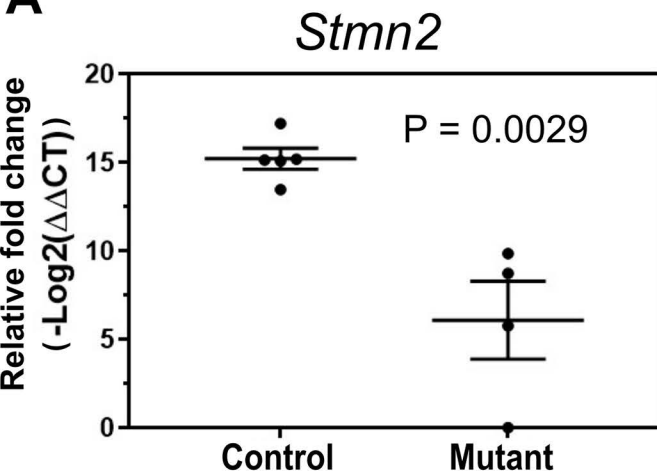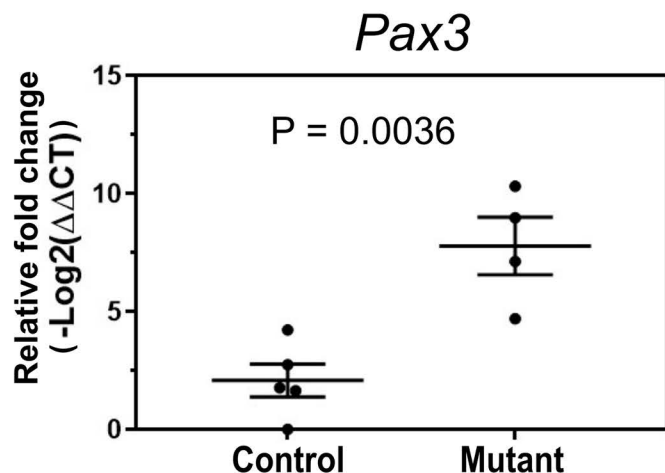

## B

Control: *Wnt1Cre*<sup>+</sup>; *R26R-TdTomato*<sup>+</sup>

Mutant: *RarαDN*<sup>LoxP/+</sup>; *Wnt1Cre*<sup>+</sup>;  
*R26R-TdTomato*<sup>+</sup>

|                                            | <i>Stmn2</i> | <i>Pax3</i> |
|--------------------------------------------|--------------|-------------|
| Log <sub>2</sub> fold change using qRT-PCR | - 9.1        | 5.7         |
| Log <sub>2</sub> fold change using RNA-Seq | - 8.0        | 6.8         |



Supplemental Figure 9

RNA-Seq correlates with immunohistochemistry

*Ret*

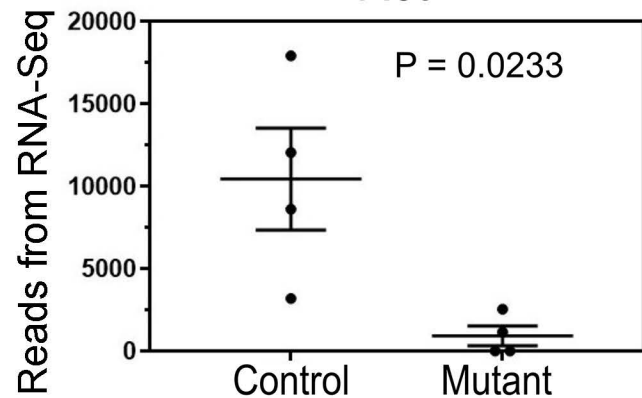

*Phox2b*

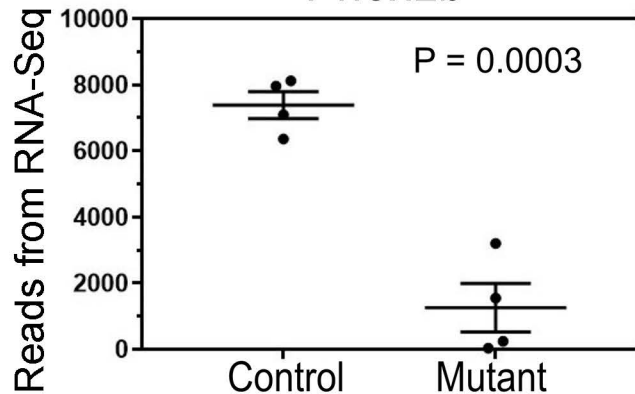

Control: *Wnt1Cre*<sup>+</sup>; *R26R-TdTomato*<sup>+</sup>

Mutant: *RarαDN*<sup>LoxP/+</sup>; *Wnt1Cre*<sup>+</sup>; *R26R-TdTomato*<sup>+</sup>
